# Supplementary material
Source: PubMed Central journal article supplement (PMC3554008)
Supplement: JB.01789-12_zjb999092384so1.pdf [file JB.01789-12_zjb999092384so1.pdf]

## **Supplemental materials for**

“Coordinated c-di-GMP repression of *Salmonella* motility through YcgR and cellulose”  
by Zorraquino V. et al.

**Table S1.** Strains and plasmids used in this study

**Table S2.** Oligonucleotides used in this study

**Figure S1.** Characterization of the deletion present in  $\Delta$ XII strain

**Figure S2.** Phenotypic analysis of new  $\Delta$ XII strain

**Supplemental references**

**Table S1** Strains and plasmids used in this study

| Strain or plasmid                          | Relevant characteristics                                                                                                                                                                               | MIC <sup>a</sup> | Reference or source |
|--------------------------------------------|--------------------------------------------------------------------------------------------------------------------------------------------------------------------------------------------------------|------------------|---------------------|
| <b>Strains</b>                             |                                                                                                                                                                                                        |                  |                     |
| <i>S. Enteritidis</i>                      |                                                                                                                                                                                                        |                  |                     |
| 3934                                       | Wild-type clinical isolate                                                                                                                                                                             | 54               | (8)                 |
| $\Delta ycgR$                              | 3934 $\Delta ycgR::Tc^R$                                                                                                                                                                               | 3068             | This study          |
| $\Delta yhjH$                              | 3934 $\Delta yhjH::Km^R$                                                                                                                                                                               | 1346             | This study          |
| $\Delta yhjH \Delta ycgR$                  | 3934 $\Delta yhjH::Km^R \Delta ycgR::Tc^R$                                                                                                                                                             | 1360             | This study          |
| $\Delta bcsA$                              | 3934 $\Delta bcsA::Cm^R$                                                                                                                                                                               | 3702             | This study          |
| $\Delta ycgR \Delta bcsA$                  | 3934 $\Delta ycgR::Tc^R \Delta bcsA::Cm^R$                                                                                                                                                             | 2058             | This study          |
| $\Delta yhjH \Delta bcsA$                  | 3934 $\Delta yhjH::Km^R \Delta bcsA::Cm^R$                                                                                                                                                             | 2507             | This study          |
| $\Delta yhjH \Delta ycgR \Delta bcsA$      | 3934 $\Delta yhjH::Km^R \Delta ycgR::Tc^R \Delta bcsA::Cm^R$                                                                                                                                           | 2650             | This study          |
| $\Delta XII$                               | 3934 $\Delta adrA \Delta sen1023 \Delta yeaJ \Delta yciR \Delta yegE \Delta yfiN \Delta yhdA \Delta sen3222 \Delta yhjK \Delta sen2484 \Delta yfeA \Delta sen4316$                                     | 1324             | This study          |
| $\Delta XII \Delta ycgR$                   | 3934 $\Delta adrA \Delta sen1023 \Delta yeaJ \Delta yciR \Delta yegE \Delta yfiN \Delta yhdA \Delta sen3222 \Delta yhjK \Delta sen2484 \Delta yfeA \Delta sen4316 \Delta ycgR::Tc^R$                   | 2051             | This study          |
| $\Delta XII P_{sen4316}::hmsT$             | 3934 $\Delta adrA \Delta sen1023 \Delta yeaJ \Delta yciR \Delta yegE \Delta yfiN \Delta yhdA \Delta sen3222 \Delta yhjK \Delta sen2484 \Delta yfeA \Delta sen4316 P_{sen4316}::hmsT$                   | 1403             | This study          |
| $\Delta XII P_{sen4316}::hmsT$ -GS         | 3934 $\Delta adrA \Delta sen1023 \Delta yeaJ \Delta yciR \Delta yegE \Delta yfiN \Delta yhdA \Delta sen3222 \Delta yhjK \Delta sen2484 \Delta yfeA \Delta sen4316 P_{sen4316}::hmsT\_E288G/E289S$      | 2164             | This study          |
| $\Delta XII P_{sen4316}::hmsT$ -3xFlag     | 3934 $\Delta adrA \Delta sen1023 \Delta yeaJ \Delta yciR \Delta yegE \Delta yfiN \Delta yhdA \Delta sen3222 \Delta yhjK \Delta sen2484 \Delta yfeA \Delta sen4316 P_{sen4316}::hmsT::3xFlag$           | 2166             | This study          |
| $\Delta XII + sen4316$ -3xFlag             | 3934 $\Delta adrA \Delta sen1023 \Delta yeaJ \Delta yciR \Delta yegE \Delta yfiN \Delta yhdA \Delta sen3222 \Delta yhjK \Delta sen2484 \Delta yfeA sen4316::3xFlag-Km^R$                               | 3913             | This study          |
| $\Delta XII \Delta ycgR P_{sen4316}::hmsT$ | 3934 $\Delta adrA \Delta sen1023 \Delta yeaJ \Delta yciR \Delta yegE \Delta yfiN \Delta yhdA \Delta sen3222 \Delta yhjK \Delta sen2484 \Delta yfeA \Delta sen4316 \Delta ycgR::Tc^R P_{sen4316}::hmsT$ | 1405             | This study          |
| CheY_D57A                                  | 3934 <i>cheY</i> _D57A                                                                                                                                                                                 | 1256             | This study          |

|                                                                                            |                                                                                                                                                                                                                                                                                                                                                                                                  |      |                                  |
|--------------------------------------------------------------------------------------------|--------------------------------------------------------------------------------------------------------------------------------------------------------------------------------------------------------------------------------------------------------------------------------------------------------------------------------------------------------------------------------------------------|------|----------------------------------|
| CheY_D13K/Y106W                                                                            | 3934 <i>cheY_D13K/Y106W</i>                                                                                                                                                                                                                                                                                                                                                                      | 1248 | This study                       |
| $\Delta$ XII $\Delta$ <i>ycgR</i> $\Delta$ <i>bcsA</i>                                     | 3934 $\Delta$ <i>adrA</i> $\Delta$ <i>sen1023</i> $\Delta$ <i>yeaJ</i> $\Delta$ <i>yciR</i> $\Delta$ <i>yegeE</i> $\Delta$ <i>yfiN</i> $\Delta$ <i>yhdA</i> $\Delta$ <i>sen3222</i> $\Delta$ <i>yhjK</i> $\Delta$ <i>sen2484</i> $\Delta$ <i>yfeA</i> $\Delta$ <i>sen4316</i> $\Delta$ <i>ycgR::Tc<sup>R</sup></i> $\Delta$ <i>bcsA::Cm<sup>R</sup></i>                                          | 2053 | This study                       |
| $\Delta$ XII $\Delta$ <i>ycgR</i> $\Delta$ <i>bcsA</i><br><i>P<sub>sen4316::hmsT</sub></i> | 3934 3934 $\Delta$ <i>adrA</i> $\Delta$ <i>sen1023</i> $\Delta$ <i>yeaJ</i> $\Delta$ <i>yciR</i> $\Delta$ <i>yegeE</i> $\Delta$ <i>yfiN</i> $\Delta$ <i>yhdA</i> $\Delta$ <i>sen3222</i> $\Delta$ <i>yhjK</i> $\Delta$ <i>sen2484</i> $\Delta$ <i>yfeA</i> $\Delta$ <i>sen4316</i> $\Delta$ <i>ycgR::Tc<sup>R</sup></i> $\Delta$ <i>bcsA::Cm<sup>R</sup></i><br><i>P<sub>sen4316::hmsT</sub></i> | 2056 | This study                       |
| $\Delta$ XII $\Delta$ <i>bcsA</i>                                                          | 3934 $\Delta$ <i>adrA</i> $\Delta$ <i>sen1023</i> $\Delta$ <i>yeaJ</i> $\Delta$ <i>yciR</i> $\Delta$ <i>yegeE</i> $\Delta$ <i>yfiN</i> $\Delta$ <i>yhdA</i> $\Delta$ <i>sen3222</i> $\Delta$ <i>yhjK</i> $\Delta$ <i>sen2484</i> $\Delta$ <i>yfeA</i> $\Delta$ <i>sen4316</i> $\Delta$ <i>bcsA::Cm<sup>R</sup></i>                                                                               | 2052 | This study                       |
| $\Delta$ XII $\Delta$ <i>bcsA</i><br><i>P<sub>sen4316::hmsT</sub></i>                      | 3934 $\Delta$ <i>adrA</i> $\Delta$ <i>sen1023</i> $\Delta$ <i>yeaJ</i> $\Delta$ <i>yciR</i> $\Delta$ <i>yegeE</i> $\Delta$ <i>yfiN</i> $\Delta$ <i>yhdA</i> $\Delta$ <i>sen3222</i> $\Delta$ <i>yhjK</i> $\Delta$ <i>sen2484</i> $\Delta$ <i>yfeA</i> $\Delta$ <i>sen4316</i> $\Delta$ <i>bcsA::Cm<sup>R</sup></i> <i>P<sub>sen4316::hmsT</sub></i>                                              | 2055 | This study                       |
| BcsA RxxxD                                                                                 | 3934 <i>bcsA_R700D</i>                                                                                                                                                                                                                                                                                                                                                                           | 4040 | This study                       |
| $\Delta$ <i>ycgR</i> BcsA RxxxD                                                            | 3934 $\Delta$ <i>ycgR::Tc<sup>R</sup></i> <i>bcsA_R700D</i>                                                                                                                                                                                                                                                                                                                                      | 4049 | This study                       |
| $\Delta$ XII BcsA RxxxD                                                                    | 3934 $\Delta$ <i>adrA</i> $\Delta$ <i>sen1023</i> $\Delta$ <i>yeaJ</i> $\Delta$ <i>yciR</i> $\Delta$ <i>yegeE</i> $\Delta$ <i>yfiN</i> $\Delta$ <i>yhdA</i> $\Delta$ <i>sen3222</i> $\Delta$ <i>yhjK</i> $\Delta$ <i>sen2484</i> $\Delta$ <i>yfeA</i> $\Delta$ <i>sen4316</i> <i>bcsA_R700D</i>                                                                                                  | 4043 | This study                       |
| $\Delta$ XII $\Delta$ <i>ycgR</i> BcsA RxxxD                                               | 3934 $\Delta$ <i>adrA</i> $\Delta$ <i>sen1023</i> $\Delta$ <i>yeaJ</i> $\Delta$ <i>yciR</i> $\Delta$ <i>yegeE</i> $\Delta$ <i>yfiN</i> $\Delta$ <i>yhdA</i> $\Delta$ <i>sen3222</i> $\Delta$ <i>yhjK</i> $\Delta$ <i>sen2484</i> $\Delta$ <i>yfeA</i> $\Delta$ <i>sen4316</i> $\Delta$ <i>ycgR::Tc<sup>R</sup></i> <i>bcsA_R700D</i>                                                             | 4045 | This study                       |
| $\Delta$ XII BcsA RxxxD<br><i>P<sub>sen4316::hmsT</sub></i>                                | 3934 $\Delta$ <i>adrA</i> $\Delta$ <i>sen1023</i> $\Delta$ <i>yeaJ</i> $\Delta$ <i>yciR</i> $\Delta$ <i>yegeE</i> $\Delta$ <i>yfiN</i> $\Delta$ <i>yhdA</i> $\Delta$ <i>sen3222</i> $\Delta$ <i>yhjK</i> $\Delta$ <i>sen2484</i> $\Delta$ <i>yfeA</i> $\Delta$ <i>sen4316</i> <i>bcsA_R700D</i> <i>P<sub>sen4316::hmsT</sub></i>                                                                 | 4044 | This study                       |
| $\Delta$ XII $\Delta$ <i>ycgR</i> BcsA RxxxD<br><i>P<sub>sen4316::hmsT</sub></i>           | 3934 $\Delta$ <i>adrA</i> $\Delta$ <i>sen1023</i> $\Delta$ <i>yeaJ</i> $\Delta$ <i>yciR</i> $\Delta$ <i>yegeE</i> $\Delta$ <i>yfiN</i> $\Delta$ <i>yhdA</i> $\Delta$ <i>sen3222</i> $\Delta$ <i>yhjK</i> $\Delta$ <i>sen2484</i> $\Delta$ <i>yfeA</i> $\Delta$ <i>sen4316</i> $\Delta$ <i>ycgR::Tc<sup>R</sup></i> <i>bcsA_R700D</i> <i>P<sub>sen4316::hmsT</sub></i>                            | 4046 | This study                       |
| <i>S. Typhimurium</i>                                                                      |                                                                                                                                                                                                                                                                                                                                                                                                  |      |                                  |
| 14028                                                                                      | Wild-Type                                                                                                                                                                                                                                                                                                                                                                                        | 685  | American Type Culture Collection |
| 14028 $\Delta$ <i>yhjH</i>                                                                 | 14028 $\Delta$ <i>yhjH::Km<sup>R</sup></i>                                                                                                                                                                                                                                                                                                                                                       | 4288 | This study                       |
| 14028 $\Delta$ <i>yhjH</i> $\Delta$ <i>bcsA</i>                                            | 14028 $\Delta$ <i>yhjH::Km<sup>R</sup></i> $\Delta$ <i>bcsA::Cm<sup>R</sup></i>                                                                                                                                                                                                                                                                                                                  | 4290 | This study                       |
| 14028 $\Delta$ <i>yhjH</i> $\Delta$ <i>ycgR</i>                                            | 14028 $\Delta$ <i>yhjH::Km<sup>R</sup></i> $\Delta$ <i>ycgR::Tc<sup>R</sup></i>                                                                                                                                                                                                                                                                                                                  | 4291 | This study                       |
| 14028 $\Delta$ <i>yhjH</i> $\Delta$ <i>ycgR</i> $\Delta$ <i>bcsA</i>                       | 14028 $\Delta$ <i>yhjH::Km<sup>R</sup></i> $\Delta$ <i>ycgR::Tc<sup>R</sup></i> $\Delta$ <i>bcsA::Cm<sup>R</sup></i>                                                                                                                                                                                                                                                                             | 4292 | This study                       |
| UMR1                                                                                       | ATCC 14028-1s NaI <sup>R</sup>                                                                                                                                                                                                                                                                                                                                                                   | 3815 | (7)                              |

|                                            |                                                                                                                                                                                                                                      |      |                                  |
|--------------------------------------------|--------------------------------------------------------------------------------------------------------------------------------------------------------------------------------------------------------------------------------------|------|----------------------------------|
| UMR1 $\Delta yhjH$                         | UMR1 $\Delta yhjH::Km^R$                                                                                                                                                                                                             | 4294 | This study                       |
| UMR1 $\Delta yhjH \Delta bcsA$             | UMR1 $\Delta yhjH::Km^R \Delta bcsA::Cm^R$                                                                                                                                                                                           | 4296 | This study                       |
| UMR1 $\Delta yhjH \Delta ycgR$             | UMR1 $\Delta yhjH::Km^R \Delta ycgR::Tc^R$                                                                                                                                                                                           | 4297 | This study                       |
| UMR1 $\Delta yhjH \Delta ycgR \Delta bcsA$ | UMR1 $\Delta yhjH::Km^R \Delta ycgR::Tc^R \Delta bcsA::Cm^R$                                                                                                                                                                         | 4298 | This study                       |
| TT3699 <i>ara652::Tn10</i>                 | Used as template for tetracycline cassette resistance amplification                                                                                                                                                                  | 2920 | Gift form G. Casadesús           |
| SV4406 <i>rcsB::MudQ</i>                   | Used as template for chloramphenicol cassette resistance amplification                                                                                                                                                               | 748  | Gift form F. García del Portillo |
| <i>E. coli</i>                             |                                                                                                                                                                                                                                      |      |                                  |
| MC4100 <i>ybeW::Km</i>                     | Used as template for kanamycin cassette resistance amplification                                                                                                                                                                     | 3015 | Gift form J. M. Ghigo            |
| XL1Blue                                    | <i>recA1 endA1 gyrA96 thi-1 hsdR17 supE44 relA1 lac</i> [F' <i>proAB lacI<sup>f</sup> Z DM15 Tn10(Tc<sup>R</sup>)</i> ]                                                                                                              | 797  | Stratagene                       |
| Plasmids                                   |                                                                                                                                                                                                                                      |      |                                  |
| pKOBEGA                                    | Amp <sup>R</sup> , vector for recombination experiments                                                                                                                                                                              | (3)  |                                  |
| pKO3Blue                                   | Cm <sup>R</sup> , derivative of pKO3 carrying the pMAD <i>lacZ</i> gene under control of the <i>PclpB</i> promoter. Vector used to generate point mutation in CheY and to construct $\Delta XII$ and $\Delta XII$ derivative strains | (9)  |                                  |
| pBR328                                     | Cloning vector Amp <sup>R</sup> , Km <sup>R</sup> , Cm <sup>R</sup>                                                                                                                                                                  | (2)  |                                  |
| pBR328:: <i>stm1987</i>                    | pBR328 containing <i>stm1987</i> from <i>S. Typhimurium</i> 14028                                                                                                                                                                    | (4)  |                                  |
| pBR328:: <i>stm1987</i> -GS                | pBR328:: <i>stm1987</i> _E479G/E480S                                                                                                                                                                                                 | (4)  |                                  |
| pGFP                                       | pMPMA3 $\Delta$ Plac containing <i>gfp</i> [LVA] without a promoter                                                                                                                                                                  | (5)  |                                  |
| pP <sub><i>fliC</i></sub> -GFP             | pMPMA3 $\Delta$ Plac containing <i>gfp</i> [LVA] downstream the <i>fliC</i> promoter                                                                                                                                                 | (5)  |                                  |
| pUA1108                                    | pGEX 4T-1 derivative plasmid carrying the <i>Ptac</i> promoter and the <i>lacI<sup>f</sup></i> gene; Amp <sup>R</sup>                                                                                                                | (6)  |                                  |
| pUA1108:: <i>bcsZ</i>                      | pUA1108 containing the <i>sen3440</i> gene under the control of the <i>Ptac</i> promoter                                                                                                                                             |      | This study                       |
| pRW99                                      | pKD46 with I-SceI endonuclease under control of tetracycline-inducible promoter ( <i>P<sub>tetA</sub></i> ), temperature-sensitive, orientation 2 (5'→3': I-SceI-tet <sup>R</sup> ), Amp <sup>R</sup>                                | (1)  |                                  |

pRW100

pKD3 with I-SceI recognition site, Cm<sup>R</sup>. Use for chloramphenicol cassette amplification in rapid mutagenesis.

---

(1)

- a. Number of each strain in the culture collection of the Laboratory of Microbial Biofilms, Instituto de Agrobiotecnología (Idab).

**Table S2** Oligonucleotides used in this study

| Primer                  | Sequence (5'–3')                                                                                               |
|-------------------------|----------------------------------------------------------------------------------------------------------------|
| <b>Gene deletion</b>    |                                                                                                                |
| <i>yjhH</i> Km Fw       | <u>gaacgccgataacctttgacgagtcggacagtcacactcccattaacaggacaactgagaaagcca</u><br><u>cgttgtgtctcaa<sup>a</sup></u>  |
| <i>yjhH</i> Km Rv       | <u>agacgaaaaggaggatgaccgcgcctcgtaataaccacgtattacgggaacagtctggcgcgctg</u><br><u>aggtctgcctcgtg<sup>a</sup></u>  |
| <i>ycgR</i> Tet Fw      | <u>gtgagtggttacaatgagcagttctgaaaaaaaaatccattagcgcgatattaggcgtgctacgctgtaat</u><br><u>cactttact<sup>b</sup></u> |
| <i>ycgR</i> Tet Rv      | <u>ttattctgcacttttattcgcttttctgggcctcgcgctcaagcgaaaaataatccgggttatcaaga</u><br><u>gggtcatta<sup>b</sup></u>    |
| <i>bcsA</i> Clo Fw      | <u>tcattgtgagcctgagccataaccgatccgacggctgtatgccgcttccgctccgggtgtaggct</u><br><u>ggagctgcttc<sup>c</sup></u>     |
| <i>bcsA</i> Clo Rv      | <u>ccctctggctggtgatgatctcgtcgactaaagaacgtcatgaaccgcgctggcggtcatcatatgaat</u><br><u>atcctccttag<sup>c</sup></u> |
| <b>Aa substitutions</b> |                                                                                                                |
| <i>cheY</i> -E          | ggctcgagaaactctgtcaaatcagcg                                                                                    |
| <i>cheY</i> -F          | ggctcgaggctggtatggcccggg                                                                                       |
| <i>cheY</i> Fw          | ggctcgagaaactctgtcaaatcagcg                                                                                    |
| <i>cheY</i> Rv          | ggctcgaggctggtatggcccggg                                                                                       |
| <i>cheY</i> Mut1 Fw     | cttaaattttggttggataatttcgacctgctcgt                                                                            |
| <i>cheY</i> Mut1 Rv     | acgacgcatggtcgaaaattatccacaacaaaaatttaag                                                                       |
| <i>cheY</i> Mut1 Comp   | acgacgcatggtcgaaaattt                                                                                          |
| <i>cheY</i> Mut2 Fw     | gctggcgccagcggttgggtcgtaaaaccgttcacc                                                                           |
| <i>cheY</i> Mut2 Rv     | ggtgaacggttttacgaccaaccgctggcgccagc                                                                            |
| <i>cheY</i> Mut2 Comp   | gctggcgccagcggttgg                                                                                             |
| <i>cheY</i> Mut3 Fw     | gctttggtttattatctccgctggaacatgccaacatg                                                                         |
| <i>cheY</i> Mut3 Rv     | catgttcggcatgtccaggcggagataataaaaccaaagc                                                                       |
| <i>cheY</i> Mut3 Comp   | catgttcggcatgtccaggcgg                                                                                         |
| PilZ Clo Fw             | <u>attctcggcggcgcggttgcggttcggttagagagtaaacaggctcaggcgcgcgcatcggcgcccta</u><br><u>cgccccgcctgc<sup>c</sup></u> |

|                     |                                                                                                               |
|---------------------|---------------------------------------------------------------------------------------------------------------|
| PilZ Clo Rv         | <u>ggtacaggagaacaatgtccatcttcgctggcgatggccccggcatggcaatctcgacctagact</u><br><u>atattaccctgtt</u> <sup>c</sup> |
| PilZ Dimer Fw       | tgcggttcggtagagagtaaacaggtcaggcgcgcatgacgtcgagattgcatgccgggggc<br>catcgcccgcgaagatg                           |
| PilZ Dimer Rv       | catcttcgctggcgatggccccggcatggcaatctcgacgtcatgctggcgctgacctgttactc<br>tctaccgaaaccgca                          |
| <i>bcsA-A</i>       | agatctgggtcttctataacctgg                                                                                      |
| <i>bcsA-B</i>       | ggatccaaccgatccgacggc                                                                                         |
| MuL                 | cgaataatccaatgtcctcc                                                                                          |
| <i>pcm</i> Fw       | acgtgtacaggtcttct                                                                                             |
| <i>sen2747</i> Rv   | ttgagttcgaagcatcc                                                                                             |
| BcsZ overexpression |                                                                                                               |
| <i>bcsZ</i> NdeI Fw | gagagaggcatatgatgactatgctgcg <sup>d</sup>                                                                     |
| <i>bcsZ</i> NotI Rv | ctctctcc <u>ggccgctt</u> aactgaacttacgatt <sup>e</sup>                                                        |

- 
- Priming sequence for the Km resistance gene underlined.
  - Priming sequence for the Tet resistance gene underlined.
  - Priming sequence for the Clo resistance gene underlined.
  - NdeI site underlined
  - NotI site underlined

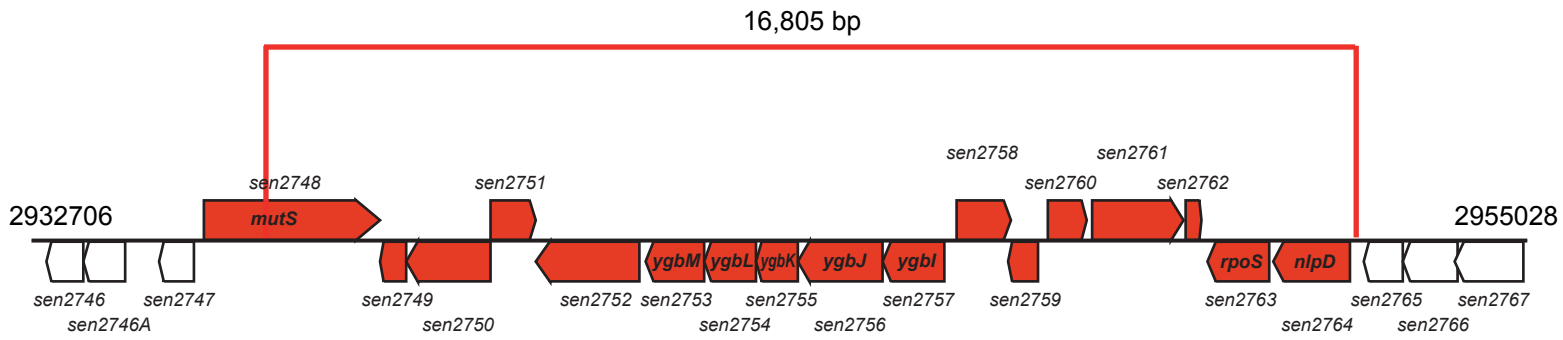

**FIG S1 Characterization of the deletion present in  $\Delta$ XII strain.** Missing region in  $\Delta$ XII strain described in (9) is delimited by red lines. This strain shows a deletion of 16,805 bp between nucleotides 2,935,768 and 2,952,573. *S. Enteritidis* P125109 genome was taken as reference.



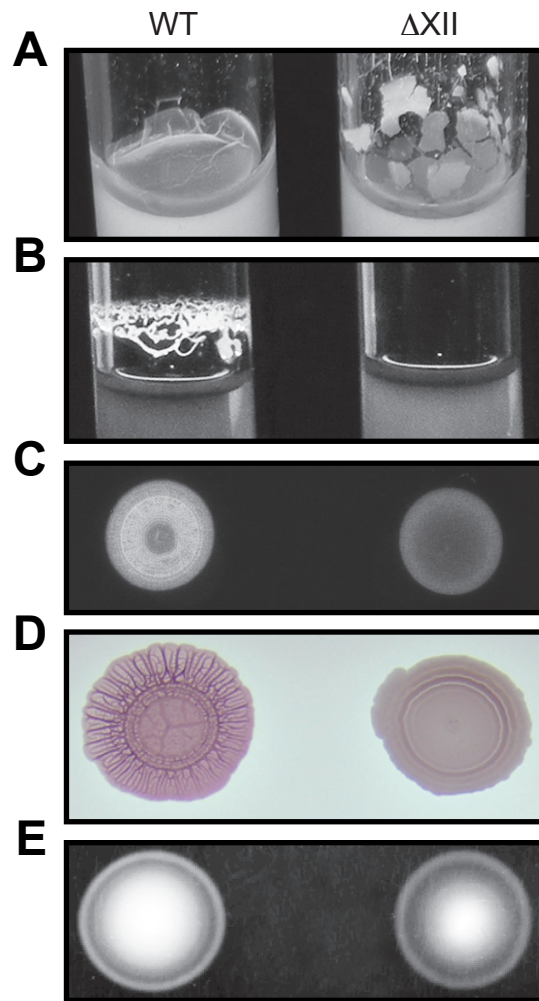

- F**
- $\Delta$  I:  $\Delta$  *adrA*
  - $\Delta$  II:  $\Delta$  *adrA*,  $\Delta$  *sen1023*
  - $\Delta$  III:  $\Delta$  *adrA*,  $\Delta$  *sen1023*,  $\Delta$  *yeaJ*
  - $\Delta$  IV:  $\Delta$  *adrA*,  $\Delta$  *sen1023*,  $\Delta$  *yeaJ*,  $\Delta$  *yciR*
  - $\Delta$  V:  $\Delta$  *adrA*,  $\Delta$  *sen1023*,  $\Delta$  *yeaJ*,  $\Delta$  *yciR*,  $\Delta$  *yegE*
  - $\Delta$  VI:  $\Delta$  *adrA*,  $\Delta$  *sen1023*,  $\Delta$  *yeaJ*,  $\Delta$  *yciR*,  $\Delta$  *yegE*,  $\Delta$  *yfiN*
  - $\Delta$  VII:  $\Delta$  *adrA*,  $\Delta$  *sen1023*,  $\Delta$  *yeaJ*,  $\Delta$  *yciR*,  $\Delta$  *yegE*,  $\Delta$  *yfiN*,  $\Delta$  *yhdA*
  - $\Delta$  VIII:  $\Delta$  *adrA*,  $\Delta$  *sen1023*,  $\Delta$  *yeaJ*,  $\Delta$  *yciR*,  $\Delta$  *yegE*,  $\Delta$  *yfiN*,  $\Delta$  *yhdA*,  $\Delta$  *sen3222*
  - $\Delta$  IX:  $\Delta$  *adrA*,  $\Delta$  *sen1023*,  $\Delta$  *yeaJ*,  $\Delta$  *yciR*,  $\Delta$  *yegE*,  $\Delta$  *yfiN*,  $\Delta$  *yhdA*,  $\Delta$  *sen3222*,  $\Delta$  *yhjK*
  - $\Delta$  X:  $\Delta$  *adrA*,  $\Delta$  *sen1023*,  $\Delta$  *yeaJ*,  $\Delta$  *yciR*,  $\Delta$  *yegE*,  $\Delta$  *yfiN*,  $\Delta$  *yhdA*,  $\Delta$  *sen3222*,  $\Delta$  *yhjK*,  $\Delta$  *sen2484*
  - $\Delta$  XI:  $\Delta$  *adrA*,  $\Delta$  *sen1023*,  $\Delta$  *yeaJ*,  $\Delta$  *yciR*,  $\Delta$  *yegE*,  $\Delta$  *yfiN*,  $\Delta$  *yhdA*,  $\Delta$  *sen3222*,  $\Delta$  *yhjK*,  $\Delta$  *sen2484*,  $\Delta$  *yfeA*
  - $\Delta$  XII:  $\Delta$  *adrA*,  $\Delta$  *sen1023*,  $\Delta$  *yeaJ*,  $\Delta$  *yciR*,  $\Delta$  *yegE*,  $\Delta$  *yfiN*,  $\Delta$  *yhdA*,  $\Delta$  *sen3222*,  $\Delta$  *yhjK*,  $\Delta$  *sen2484*,  $\Delta$  *yfeA*,  $\Delta$  *sen4316*

**FIG S2 Phenotypic analysis of new  $\Delta$ XII strain.** (A) Biofilm formation capacity in LB medium conditions and (B) adherence test medium (ATM) conditions. (C) Cellulose production on calcofluor agar plates. (D) Cellulose and fimbriae production on congo red agar plates. (E) Swimming motility. (F) Heading of genotype of sequential mutants that were constructed in the process of generating new  $\Delta$ XII strain.

## Supplemental references

1. **Blank K., M. Hensel, and R. G. Gerlach.** 2011. Rapid and highly efficient method for scarless mutagenesis within the *Salmonella enterica* chromosome. PLoS ONE 6:e15763.
2. **Bolivar F., and K. Backman.** 1979. Plasmids of *Escherichia coli* as cloning vectors. Meth. Enzymol. 68:245–267.
3. **Chaveroche M. K., J. M. Ghigo, and C. d'Enfert.** 2000. A rapid method for efficient gene replacement in the filamentous fungus *Aspergillus nidulans*. Nucleic Acids Res. 28:E97.
4. **García B., C. Latasa, C. Solano, F. G.-D. Portillo, C. Gamazo, and I. Lasa.** 2004. Role of the GGDEF protein family in *Salmonella* cellulose biosynthesis and biofilm formation. Mol. Microbiol. 54:264–277.
5. **Ibarra J. A., L. A. Knodler, D. E. Sturdevant, K. Virtaneva, A. B. Carmody, E. R. Fischer, S. F. Porcella, and O. Steele-Mortimer.** 2010. Induction of *Salmonella* pathogenicity island 1 under different growth conditions can affect *Salmonella*-host cell interactions in vitro. Microbiology 156:1120–1133.
6. **Medina-Ruiz L., S. Campoy, C. Latasa, P. Cardenas, J. C. Alonso, and J. Barbe.** 2010. Overexpression of the *recA* gene decreases oral but not intraperitoneal fitness of *Salmonella enterica*. Infect. Immun. 78:3217–3225.
7. **Romling U., Z. Bian, M. Hammar, W. D. Sierralta, and S. Normark.** 1998. Curli fibers are highly conserved between *Salmonella typhimurium* and *Escherichia coli* with respect to operon structure and regulation. J. Bacteriol. 180:722–731.
8. **Solano C., B. Sesma, M. Alvarez, T. J. Humphrey, C. J. Thorns, and C. Gamazo.** 1998. Discrimination of strains of *Salmonella enteritidis* with differing levels of virulence by an in vitro glass adherence test. J. Clin. Microbiol. 36:674–678.
9. **Solano C., B. García, C. Latasa, A. Toledo-Arana, V. Zorraquino, J. Valle, J. Casals, E. Pedroso, and I. Lasa.** 2009. Genetic reductionist approach for dissecting individual roles of GGDEF proteins within the c-di-GMP signaling network in *Salmonella*. Proc. Natl. Acad. Sci. U. S. A. 106:7997–8002.
